# Supplementary material for: Barriers to and Facilitators of Adherence to Clinical Practice Guidelines in the Middle East and North Africa Region: A Systematic Review
Source: PubMed Central journal article supplement (PMC7765264; doi:10.3390/healthcare8040564), 2020-12-15
Supplement: healthcare-08-00564-s001.pdf [file healthcare-08-00564-s001.pdf]

Supplementary materials

Table S1: Search Strategy

|                                                               |                                                                                                                                                                                                                                                                                                                                                                                                                                                                                                                                                                                                                                                                                                                                                                                                                                                                            |
|---------------------------------------------------------------|----------------------------------------------------------------------------------------------------------------------------------------------------------------------------------------------------------------------------------------------------------------------------------------------------------------------------------------------------------------------------------------------------------------------------------------------------------------------------------------------------------------------------------------------------------------------------------------------------------------------------------------------------------------------------------------------------------------------------------------------------------------------------------------------------------------------------------------------------------------------------|
| Generated<br>using<br>PubMed<br>Advanced<br>Search<br>Builder | <pre> ((((((((((((((((((((((((((((((((((((((((((((((((((((((((((((((((((CPG*) OR Clinical Practice Guideline*) OR Clinical guideline*) OR Guideline*) OR Practice Guideline*) AND Middle East*) OR Algeria*) OR Bahrain*) OR Kingdom of Bahrain) OR Djibouti) OR Egypt*) OR Arab Republic of Egypt) OR Iran*) OR Islamic Republic of Iran) OR Iraq*) OR Syrian Arab Republic) OR Syria*) OR Kuwait*) OR Hashemite Kingdom of Jordan) OR Jordan) OR Leban*) OR Lebanon) OR Morocco) OR Maghreb) OR Maghrib) OR Libya) OR Qatar) OR Somalia*) OR Sudan) OR Tunisia) OR Tunis) OR Saudi Arabia*) OR Kingdom of Saudi Arabia) OR Saudi) OR Yemen) OR United Arab Emirates) OR Emirat*) OR Palestine) OR Occupied Palestinian Territory) OR Israel) OR Gaza) OR Gazah) OR Gaza and the West Bank) OR The West Bank) OR Gulf Cooperation Council) OR Gulf) OR GCC         </pre> |
|---------------------------------------------------------------|----------------------------------------------------------------------------------------------------------------------------------------------------------------------------------------------------------------------------------------------------------------------------------------------------------------------------------------------------------------------------------------------------------------------------------------------------------------------------------------------------------------------------------------------------------------------------------------------------------------------------------------------------------------------------------------------------------------------------------------------------------------------------------------------------------------------------------------------------------------------------|

Table S 2. Barriers for implementations of clinical practice guidelines

| Category                | Barriers                                                                           | Qualitative |          |       | Mixed |         | Quantitative |       |        |       |        |         |         | Total number |          |
|-------------------------|------------------------------------------------------------------------------------|-------------|----------|-------|-------|---------|--------------|-------|--------|-------|--------|---------|---------|--------------|----------|
|                         |                                                                                    | Radwan      | Alkhatib | Seyed | Wahbi | Elsadig | Radwan       | Salma | Sharif | Jradi | Thabet | AlSubai | Alnoush |              | Al-Azzam |
| Healthcare professional | Lack of awareness of the existence of guidelines                                   |             |          |       | ✓     |         |              |       |        |       |        | ✓       |         |              | 2        |
|                         | Lack of familiarity with CPGs recommendation                                       |             |          |       | ✓     |         |              |       |        |       |        | ✓       |         | ✓            | 3        |
|                         | Disagreement to the recommendations of the CPG                                     |             |          |       | ✓     |         | ✓            |       |        |       |        | ✓       |         |              | 3        |
|                         | Doubts about the positive impact of CPGs on outcomes                               |             |          |       |       |         |              |       |        | ✓     |        |         |         | ✓            | 2        |
|                         | Preference for experience over CPGs                                                |             |          | ✓     |       |         |              |       |        |       |        |         |         |              | 1        |
|                         | Lack of effective communication, research and self-learning skills                 |             |          | ✓     |       |         |              |       |        |       |        |         |         |              | 1        |
|                         | Lack of healthcare professional motivation                                         |             |          | ✓     |       |         | ✓            |       |        |       |        | ✓       |         |              | 3        |
| Guidelines              | Lack of clarity or complexity                                                      |             |          | ✓     |       |         | ✓            |       | ✓      |       |        | ✓       |         |              | 4        |
|                         | Rigid guidelines may not always be practical and cannot be applied on a day-to-day |             |          |       |       |         |              |       |        |       |        |         |         |              |          |
|                         | Outdated guidelines                                                                | ✓           |          |       |       |         |              |       |        |       |        |         |         |              | 1        |
|                         | Guideline trustworthiness (evidence quality, content, developer)                   | ✓           |          | ✓     | ✓     | ✓       | ✓            |       |        |       | ✓      |         |         |              | 6        |
| Patients                | Language and literacy problems                                                     |             |          |       | ✓     |         |              |       |        |       |        |         |         |              | 1        |
|                         | Lack of motivation, compliance and knowledge to follow the recommendations         |             | ✓        |       |       |         |              |       |        | ✓     |        | ✓       |         | ✓            | 4        |
|                         | Patients' financial situation and occupational status                              |             |          |       |       |         |              | ✓     | ✓      |       |        |         |         |              | 2        |
